# Supplementary material
Source: publisher figshare collection journal article supplement (https://brill.figshare.com/ndownloader/files/36978736)
Supplement: Supplementary file 1 [file 36978736]

**Table A1.** Ethogram of behaviours displayed towards the tool use set-up and average occurrences of the behaviours observed during the study (*N* = 11 birds; mean ± standard deviation).

| Behaviour | Explanation | Average occurrences |
| --- | --- | --- |
| Pull | Pulling an already inserted stick and successfully getting food | 6.0 ± 6.53 |
| Handle | Handling a stick with the beak | 21.2 ± 35.3 |
| Peck | Pecking at acrylic wall to reach food | 81.0 ± 63.0 |
| Inspect | Close visual inspection with one or both eyes near the acrylic walls without a subsequent peck | 22.1 ± 28.8 |
| Foot | Grabbing the acrylic wall with a foot or perching on the acrylic wall | 7.27 ± 14.8 |
| Eat | Eating food of off the set-up, e.g., usually when a mealworm escaped | 17.6 ± 23.0 |

Tool use as a behaviour was not included in the ethogram because it was only displayed once by a single bird.

**Table A2.** Total amount of time (min) each bird was presented the tool use apparatus.

| Bird ID | Time test presented (min) |
| --- | --- |
| Cox (466) | 127 |
| Darcy (478) | 25 |
| Degoey (146) | 147 |
| Goldsack (167) | 28 |
| Grundy (156) | 45 |
| Pendlebury (182) | 21 |
| Sidebottom (152) | 180 |
| Swan (173) | 1004 |
| Taylor (424) | 65 |
| Treloar (467) | 43 |
| Tufty (196) | 32 |

**Table A3.** Number of times each bird pulled the stick to acquire food.

| Bird ID | Number of stick pulls |
| --- | --- |
| Cox (466) | 14 |
| Darcy (478) | 0 |
| Degoey (146) | 15 |
| Goldsack (167) | 0 |
| Grundy (156) | 4 |
| Pendlebury (182) | 2 |
| Sidebottom (152) | 13 |
| Swan (173) | 14 |
| Taylor (424) | 0 |
| Treloar (467) | 4 |
| Tufty (196) | 0 |
